# Supplementary material
Source: publisher site journal article supplement (https://www.dovepress.com/get_supplementary_file.php?f=423418.docx)
Supplement: Supplementary file 1 [file get_supplementary_file.php]

Supplementary Material

Table S1 P[rogram](javascript:;) of *ant(6)FMS-007* mutants

| Recombinant plasmids | Native amino acid site → mutated amino acid site  Mutations | Native codons - mutated codons | Charge of mutated amino acid site |
| --- | --- | --- | --- |
| *ant(6)38*/pET15b | 38Asp(D) → Glu(E) | GAT-GAA | Negative charge |
|  | 38Asp(D) → His(H) | GAT-CAT | Positive charge |
|  | 38Asp(D) → Ala(A) | GAT-GCA | Nonpolarity |
| *ant(6)42*/pET15b | 42Asp(D) → Glu(E) | GAT-GAA | Negative charge |
|  | 42Asp(D) → His(H) | GAT-CAT | Positive charge |
|  | 42Asp(D) → Ala(A) | GAT-GCA | Nonpolarity |
| *ant(6)95*/pET15b | 95Lys(K) →Asp(D) | AAA-GAC | Negative charge |
|  | 95Lys(K) →Arg(R) | AAA-AGA | Positive charge |
|  | 95Lys(K) →Ala(A) | AAA-GCA | Nonpolarity |
| *ant(6)148*/pET15b | 148Lys(K) →Asp(D) | AAA-GAC | Negative charge |
|  | 148Lys(K) →Arg(R) | AAA-AGA | Positive charge |
|  | 148Lys(K) →Ala(A) | AAA-GCA | Nonpolarity |
| *ant(6)162*/pET15b | 162Try(W) →Glu(E) | TGG-GAG | Negative charge |
|  | 162Try(W) →Arg(R) | TGG-CGG | Positive charge |
|  | 162Try(W) →Ala(A) | TGG-GCG | Nonpolarity |
| *ant(6)191*/pET15b | 191Glu(E) → Asp(D) | GAA-GAC | Negative charge |
|  | 191Glu(E) → Arg(R) | GAA-AGA | Positive charge |
|  | 191Glu(E) → Ala(A) | GAA-GCA | Nonpolarity |
| *ant(6)199*/pET15b | 199Trp(W) →Glu(E) | TGG-GAG | Negative charge |
|  | 199Trp(W) →Arg(R) | TGG-CGG | Positive charge |
|  | 199Trp(W) →Ala(A) | TGG-GCG | Nonpolarity |
| *ant(6)213*/pET15b | 213Lys(K) →Asp(D) | AAA-GAC | Negative charge |
|  | 213Lys(K) →Arg(R) | AAA-AGA | Positive charge |
|  | 213Lys(K) →Ala(A) | AAA-GCA | Nonpolarity |

*ant(6):ant(6)FMS-007.*

Table S2 Primers of *ant(6)FMS-007* mutants

| Mutants | Primers (5’ to 3’) |
| --- | --- |
| D38A | F: CATCCAGATCACTGAAATCTGCGACCGGAGCTAAGGGATT |
| R: AATCCCTTAGCTCCGGTCGCAGATTTCAGTGATCTGGATG |
| D38E | F: CCAGATCACTGAAATCTTCGACCGGAGCTAAGG |
| R: CCTTAGCTCCGGTCGAAGATTTCAGTGATCTGG |
| D38H | F: CATCCAGATCACTGAAATCATGGACCGGAGCTAAGGGATTT |
| R: AAATCCCTTAGCTCCGGTCCATGATTTCAGTGATCTGGATG |
| D42A | F: TAAGCTCTACATCCAGAGCACTGAAATCGTCGACC |
| R: GGTCGACGATTTCAGTGCTCTGGATGTAGAGCTTA |
| D42E | F: TATAAGCTCTACATCCAGTTCACTGAAATCGTCGACC |
| R: GGTCGACGATTTCAGTGAACTGGATGTAGAGCTTATA |
| D42H | F: AAGCTCTACATCCAGATGACTGAAATCGTCGACCG |
| R: CGGTCGACGATTTCAGTCATCTGGATGTAGAGCTT |
| K95D | F: ATAAAGCTTAAAATCCACGTCTACAGTGTCTTCATACAAAACCATTTTCATGGCA |
| R: TGCCATGAAAATGGTTTTGTATGAAGACACTGTAGACGTGGATTTTAAGCTTTAT |
| K95A | F: GACTTATGATAAAGCTTAAAATCCACTGCTACAGTGTCTTCATACAAAACCATTTTCA |
| R: TGAAAATGGTTTTGTATGAAGACACTGTAGCAGTGGATTTTAAGCTTTATCATAAGTC |
| K95R | F: AAAGCTTAAAATCCACTCTTACAGTGTCTTCATACAAAACCATTTTCATGG |
| R: CCATGAAAATGGTTTTGTATGAAGACACTGTAAGAGTGGATTTTAAGCTTT |
| K148D | F: AAATTTTTTTTCATCTGGGTCTTTGATAATTGAAACCTGATGTGTCGGAGGTTTCA |
| R: TGAAACCTCCGACACATCAGGTTTCAATTATCAAAGACCCAGATGAAAAAAAATTT |
| K148A | F: TGAAACCTCCGACACATCAGGTTTCAATTATCAAAGCACCAGATGAAAAAAAATT |
| R: AATTTTTTTTCATCTGGTGCTTTGATAATTGAAACCTGATGTGTCGGAGGTTTCA |
| K148R | F: TTTTTTTTCATCTGGTCTTTTGATAATTGAAACCTGATGTGTCGGAGG |
| R: CCTCCGACACATCAGGTTTCAATTATCAAAAGACCAGATGAAAAAAAA |
| W162E | F: GCGACATAGGTACAGTCCCACTCGAAATCTGTAATCAGTTTTGC |
| R: GCAAAACTGATTACAGATTTCGAGTGGGACTGTACCTATGTCGC |
| W162A | F: CGACATAGGTACAGTCCCACGCGAAATCTGTAATCAGTTTTG |
| R: CAAAACTGATTACAGATTTCGCGTGGGACTGTACCTATGTCG |
| W162R | F: ATAGGTACAGTCCCACCGGAAATCTGTAATCAGTTTTGCA |
| R: TGCAAAACTGATTACAGATTTCCGGTGGGACTGTACCTAT |
| E191D | F: CATTCCAATAGTGGTACCAGATAGTCCGTTCTGATAATATTTTCTGA |
| R: TCAGAAAATATTATCAGAACGGACTATCTGGTACCACTATTGGAATG |
| E191A | F: ATTCCAATAGTGGTACCAGATATGCCGTTCTGATAATATTTTCTGAC |
| R: GTCAGAAAATATTATCAGAACGGCATATCTGGTACCACTATTGGAAT |
| E191R | F: CCATTCCAATAGTGGTACCAGATATCTCGTTCTGATAATATTTTCTGACATG  ATCTCGTTCTGATAATATTTTCTGACATG |
| R: CATGTCAGAAAATATTATCAGAACGAGATATCTGGTACCACTATTGGAATGG  GATATCTGGTACCACTATTGGAATGG |
| W199E | F: TGTGCTTATTTGCAATATGCTCTTCCAATAGTGGTACCAGATATTCCG |
| R: CGGAATATCTGGTACCACTATTGGAAGAGCATATTGCAAATAAGCACA |
| W199A | F: GTGCTTATTTGCAATATGCGCTTCCAATAGTGGTACCAGATATTCC |
| R: GGAATATCTGGTACCACTATTGGAAGCGCATATTGCAAATAAGCAC |
| W199R | F: GCTTATTTGCAATATGCCGTTCCAATAGTGGTACCAGATATTCC |
| R: GGAATATCTGGTACCACTATTGGAACGGCATATTGCAAATAAGC |
| K213D | F: TTGAAAAGCCTTCCGTGGTCATTGGTTGTAATATCCCAATTGTGCTTATTTG |
| R: CAAATAAGCACAATTGGGATATTACAACCAATGACCACGGAAGGCTTTTCAA |
| K213A | F: TGAAAAGCCTTCCGTGTGCATTGGTTGTAATATCCCAATTGTGCTTATTTGC |
| R: GCAAATAAGCACAATTGGGATATTACAACCAATGCACACGGAAGGCTTTTCA |
| K213R | F: AAAGCCTTCCGTGTCTATTGGTTGTAATATCCCAATTGTGCT |
| R: AGCACAATTGGGATATTACAACCAATAGACACGGAAGGCTTT |

Table S3. MIC and inhibition zone diameters of predicted aminoglycoside resistance genes transformants in *E.coli* BL21

| Strains | Methods | Antimicrobial agents | | | | |
| --- | --- | --- | --- | --- | --- | --- |
| AMK | TOB | GEN | KAN | STR |
| Transformants with pET15b | MIC (μg/ml) | S(1) | S(0.25) | S(0.5) | S(2) | NA(4) |
| K-B (mm) | S(21) | S(21) | S(19) | S(23) | S(17) |
| Transformants with *ant(6)*/pET15b | MIC (μg/ml) | S(1) | S(0.5) | S(0.5) | S(2) | **NA(512)** |
| K-B (mm) | S(21) | S(21) | S(19) | S(23) | **R(10)** |
| Transformants with *aph*1/pET15b | MIC (μg/ml) | S(1) | S(0.25) | S(0.5) | S(2) | NA(8) |
| K-B (mm) | S(21) | S(20) | S(19) | S(23) | S(17) |
| Transformants with *aph*2/pET15b | MIC (μg/ml) | S(2) | S(0.5) | S(0.5) | S(2) | NA(16) |
| K-B (mm) | S(21) | S(21) | S(19) | S(23) | S(17) |
| Transformants with *aac*1/pET15b | MIC (μg/ml) | S(1) | S(0.25) | S(0.5) | S(2) | NA(8) |
| K-B (mm) | S(21) | S(20) | S(19) | S(23) | S(17) |
| Transformants with *aac*2/pET15b | MIC (μg/ml) | S(1) | S(0.5) | S(0.5) | S(2) | NA(8) |
| K-B (mm) | S(21) | S(20) | S(19) | S(23) | S(17) |
| Transformants with *aac*3/pET15b | MIC (μg/ml) | S(1) | S(0.5) | S(0.5) | S(2) | NA(8) |
| K-B (mm) | S(21) | S(20) | S(19) | S(23) | S(17) |
| EM FMS-007 | MIC (μg/ml) | R(128)* | R(256)* | R(128)* | R(512) | NA(512) |
| K-B (mm) | R (6) | R (6) | I (14) | I (14) | R (12) |

Antimicrobial susceptibility results were interpreted based on the breakpoints of the Enterobacterales listed in the M100-S31 guidelines (CLSI, 2021). *: Antimicrobial susceptibility results were interpreted based on the breakpoints of the other non-Enterobacterales listed in the M100-S31 guidelines (CLSI, 2021). MIC: minimum inhibitory concentration; K-B: Kirby-Bauer; NA: Not applicable, there is no data in the M100-S31 guidelines (CLSI, 2021); Bold: Candidate resistance genes showed obvious resistance.
